# Supplementary material for: Genome-Wide Identification, Characterization and Expression Analysis of Lipoxygenase Gene Family in Artemisia annua L.
Source: MDPI journal article supplement (doi:10.3390/plants11050655), 2022-02-28
Supplement: s1 [file s1]

Table S1. The gene family information of *LOX* in *A. annua*.

| Gene name      | Start    | End      | Amino acids | MW(Da)   | PI   | GRAVY  | Instability index | subcellular localization   |
|----------------|----------|----------|-------------|----------|------|--------|-------------------|----------------------------|
| <i>AaLOX1</i>  | 2585575  | 2591359  | 942         | 107314.1 | 6.89 | -0.452 | 41.96             | Chloroplast.<br>Cytoplasm. |
| <i>AaLOX2</i>  | 6877551  | 6882426  | 916         | 103246.9 | 6.42 | -0.349 | 42.86             | chloroplast                |
| <i>AaLOX3</i>  | 854174   | 859331   | 855         | 97105.7  | 5.88 | -0.38  | 42.03             | Chloroplast.<br>Cytoplasm. |
| <i>AaLOX4</i>  | 44677560 | 44680589 | 532         | 60617.39 | 5.78 | -0.257 | 48.83             | Cytoplasm                  |
| <i>AaLOX5</i>  | 76879119 | 76886931 | 901         | 102269.6 | 5.52 | -0.417 | 42.45             | Chloroplast.<br>Cytoplasm. |
| <i>AaLOX6</i>  | 63906308 | 63918611 | 924         | 104069.1 | 5.65 | -0.359 | 41.32             | chloroplast                |
| <i>AaLOX7</i>  | 11748184 | 11755721 | 868         | 98723.29 | 5.78 | -0.433 | 39.21             | chloroplast                |
| <i>AaLOX8</i>  | 88227373 | 88231725 | 905         | 102497.7 | 6.68 | -0.423 | 40.05             | Chloroplast.<br>Cytoplasm. |
| <i>AaLOX9</i>  | 767964   | 76815047 | 1217        | 139133   | 6.52 | -0.395 | 46.1              | chloroplast                |
| <i>AaLOX10</i> | 13058884 | 13069498 | 871         | 99650.25 | 5.51 | -0.407 | 42.1              | Chloroplast.<br>Cytoplasm. |

|                |          |          |     |          |      |        |       |                            |
|----------------|----------|----------|-----|----------|------|--------|-------|----------------------------|
| <i>AaLOX11</i> | 63804505 | 63812481 | 924 | 103970.1 | 5.65 | -0.369 | 42.65 | chloroplast                |
| <i>AaLOX12</i> | 880807   | 891175   | 887 | 100541.5 | 5.5  | -0.326 | 38.68 | Chloroplast.<br>Cytoplasm. |
| <i>AaLOX13</i> | 925787   | 933063   | 867 | 99423.62 | 5.83 | -0.505 | 48.53 | Cytoplasm                  |
| <i>AaLOX14</i> | 76846023 | 76852677 | 902 | 100977.5 | 5.59 | -0.33  | 36.68 | chloroplast                |
| <i>AaLOX15</i> | 23       | 4318     | 738 | 83760.86 | 5.22 | -0.397 | 38.32 | chloroplast                |
| <i>AaLOX16</i> | 13073867 | 13087546 | 868 | 99089.76 | 5.73 | -0.424 | 39.77 | Chloroplast.<br>Cytoplasm. |
| <i>AaLOX17</i> | 63778878 | 63788962 | 853 | 96495.65 | 5.25 | -0.378 | 40.64 | chloroplast                |
| <i>AaLOX18</i> | 13044457 | 13058394 | 882 | 100331.9 | 5.28 | -0.379 | 43.21 | Cytoplasm                  |
| <i>AaLOX19</i> | 29658    | 30051    | 130 | 15093.37 | 5.74 | -0.504 | 32.46 | Chloroplast.<br>Cytoplasm. |
| <i>AaLOX20</i> | 76859253 | 76864081 | 899 | 101320.9 | 5.71 | -0.381 | 39.27 | chloroplast                |

---
