# Supplementary material for: Genome-Wide Identification, Characterization and Expression Analysis of Lipoxygenase Gene Family in Artemisia annua L.
Source: MDPI journal article supplement (doi:10.3390/plants11050655), 2022-02-28
Supplement: s1 [file s1]

Table S4. *AaLOX5* and *AaLOX17* primer sequences.

| Gene ID | Forward primer (5' to 3') | Reverse primer (5' to 3') |
|---------|---------------------------|---------------------------|
| AaLOX5  | GAGCGACAATCATTTGACAGG     | ATGCCACCAAGCACAGGAC       |
| AaLOX17 | GGTTCAATCGGGGCAGTT        | TGGGGAGTCCTTCAATAA        |
| GAPDH   | TCCTAGCAAGGATGCTCCCA      | AGGAGCAAGGCAGTTGGTTG      |
