# Supplementary material for: Genome-Wide Identification, Characterization and Expression Analysis of Lipoxygenase Gene Family in Artemisia annua L.
Source: MDPI journal article supplement (doi:10.3390/plants11050655), 2022-02-28
Supplement: s1 [file s1]

Table S3. Secondary structure analysis of *AaLOX* proteins.

| Gene name      | Secondary structure(%) |           |             |                 |
|----------------|------------------------|-----------|-------------|-----------------|
|                | Alpha helix            | Beta turn | Random coil | Extended strand |
| <i>AaLOX1</i>  | 39.17                  | 4.99      | 43.21       | 12.63           |
| <i>AaLOX2</i>  | 38.54                  | 5.24      | 42.47       | 13.76           |
| <i>AaLOX3</i>  | 37.31                  | 5.5       | 43.27       | 13.92           |
| <i>AaLOX4</i>  | 43.8                   | 3.95      | 41.73       | 10.53           |
| <i>AaLOX5</i>  | 36.29                  | 5.22      | 44.28       | 14.21           |
| <i>AaLOX6</i>  | 35.06                  | 5.41      | 45.24       | 14.29           |
| <i>AaLOX7</i>  | 37.9                   | 5.53      | 43.09       | 13.48           |
| <i>AaLOX8</i>  | 40.55                  | 4.64      | 42.32       | 12.49           |
| <i>AaLOX9</i>  | 36.15                  | 5.26      | 44.04       | 14.54           |
| <i>AaLOX10</i> | 37.54                  | 5.17      | 44          | 13.2            |
| <i>AaLOX11</i> | 35.61                  | 4.55      | 46          | 13.85           |
| <i>AaLOX12</i> | 36.46                  | 5.64      | 43.57       | 14.33           |
| <i>AaLOX13</i> | 38.64                  | 5.54      | 42.21       | 13.61           |
| <i>AaLOX14</i> | 37.36                  | 4.88      | 45.5        | 12.2            |
| <i>AaLOX15</i> | 38.08                  | 5.28      | 43.63       | 13.01           |
| <i>AaLOX16</i> | 37.67                  | 5.99      | 42.86       | 13.48           |
| <i>AaLOX17</i> | 0.3575                 | 4.98      | 44.53       | 14.73           |
| <i>AaLOX18</i> | 37.19                  | 5.67      | 43.54       | 13.61           |
| <i>AaLOX19</i> | 46.15                  | 3.85      | 43.85       | 6.15            |
| <i>AaLOX20</i> | 38.38                  | 5.01      | 43.6        | 13.01           |
