# Supplementary material for: Genome-Wide Identification, Characterization and Expression Analysis of Lipoxygenase Gene Family in Artemisia annua L.
Source: MDPI journal article supplement (doi:10.3390/plants11050655), 2022-02-28
Supplement: s1 [file s1]

Table S2. Divergence between paralogous *LOX* gene pairs in *A. annua*.

| gene1          | gene2   | Ka    | Ks    | Ka/Ks |
|----------------|---------|-------|-------|-------|
| <i>AaLOX2</i>  | AaLOX3  | 0.026 | 0.173 | 0.148 |
| <i>AaLOX5</i>  | AaLOX9  | 0.107 | 0.617 | 0.174 |
| <i>AaLOX7</i>  | AaLOX8  | 0.140 | 0.740 | 0.189 |
| <i>AaLOX11</i> | AaLOX19 | 0.001 | 0.010 | 0.061 |
| <i>AaLOX16</i> | AaLOX17 | 0.066 | 0.435 | 0.152 |
| <i>AaLOX18</i> | AaLOX20 | 0.102 | 0.147 | 0.696 |
