# Supplementary material for: Genome-Wide Identification, Characterization and Expression Analysis of Lipoxygenase Gene Family in Artemisia annua L
Source: Plants (Basel). 2022 Feb 28;11(5):655. doi: 10.3390/plants11050655 (PMC8912875; doi:10.3390/plants11050655)
Supplement: Supplementary file 1 [file plants-11-00655-s001.zip]

Archive with 5 entries (5 files):
- Figure S1 The tertiary structure of 17 proteins of AaLOX.pdf
- Table S1 The gene family information of LOX in A. annua.pdf
- Table S2 Divergence between paralogous LOX gene pairs in A.pdf
- Table S3 Secondary structure analysis of AaLOX proteins.pdf
- Table S4 AaLOX5 and AaLOX17 primer sequences.pdf
