# Supplementary figures and images for: Genome-Wide Identification, Characterization and Expression Analysis of Lipoxygenase Gene Family in Artemisia annua L.
Source: MDPI journal article supplement (doi:10.3390/plants11050655), 2022-02-28

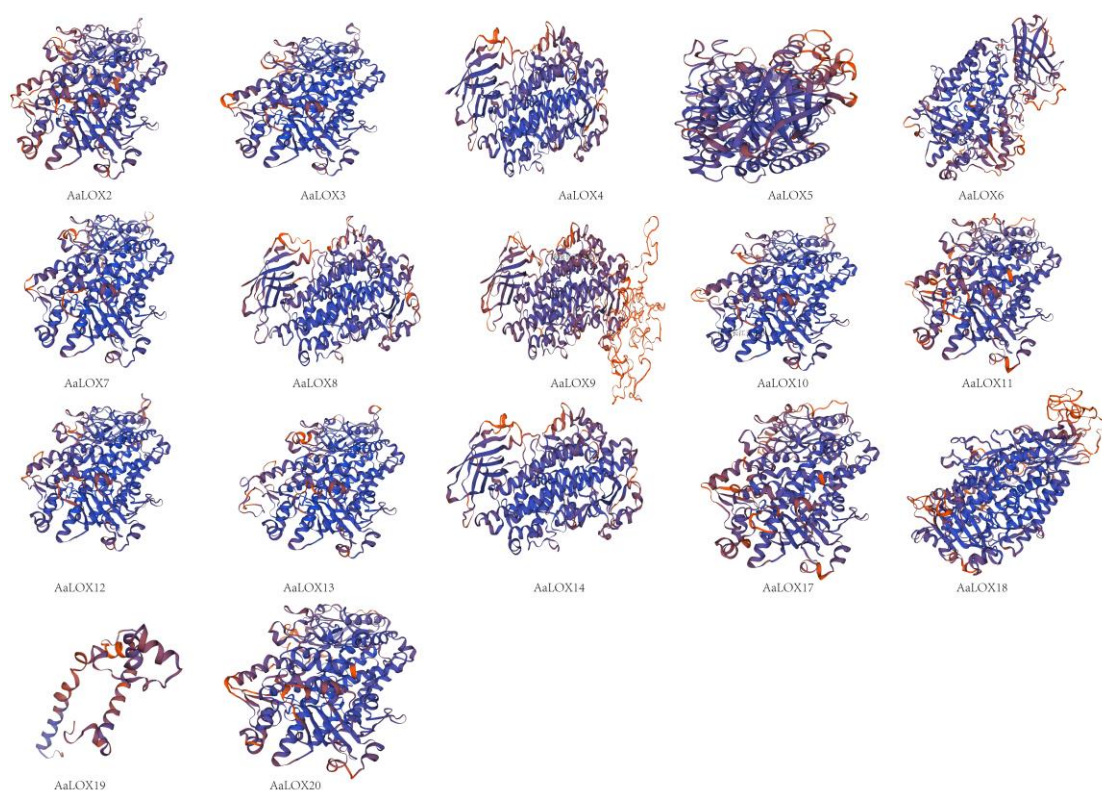

Figure S1. The tertiary structure of 17 proteins of *AaLOX*.

Supplement: s1 [file s1]
